# Supplementary material for: Dynamic multimodal interactions in navigating wood ants: What do path details tell us about cue integration?
Source: Oxford University Press journal article supplement (doi:10.1242/jeb.221036), 2020-01-01
Supplement: jeb221036supp.pdf [file jeb221036supp.pdf]

**Figure S1: Visualisation of the odour plume.** Draeger air flow tester (tube visible at the lower end of the picture) was used to release smoking sulfuric acid and was connected to the same pump used for providing the air flow during the behavioural experiments. Smoke plume is visible between white dashed lines. Platform was covered with black paper for smoke visualisation.

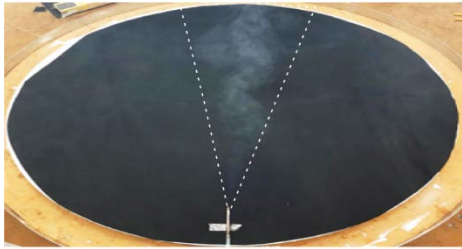

Figure S1
